# Supplementary material
Source: PubMed Central journal article supplement (PMC4722812)

**A**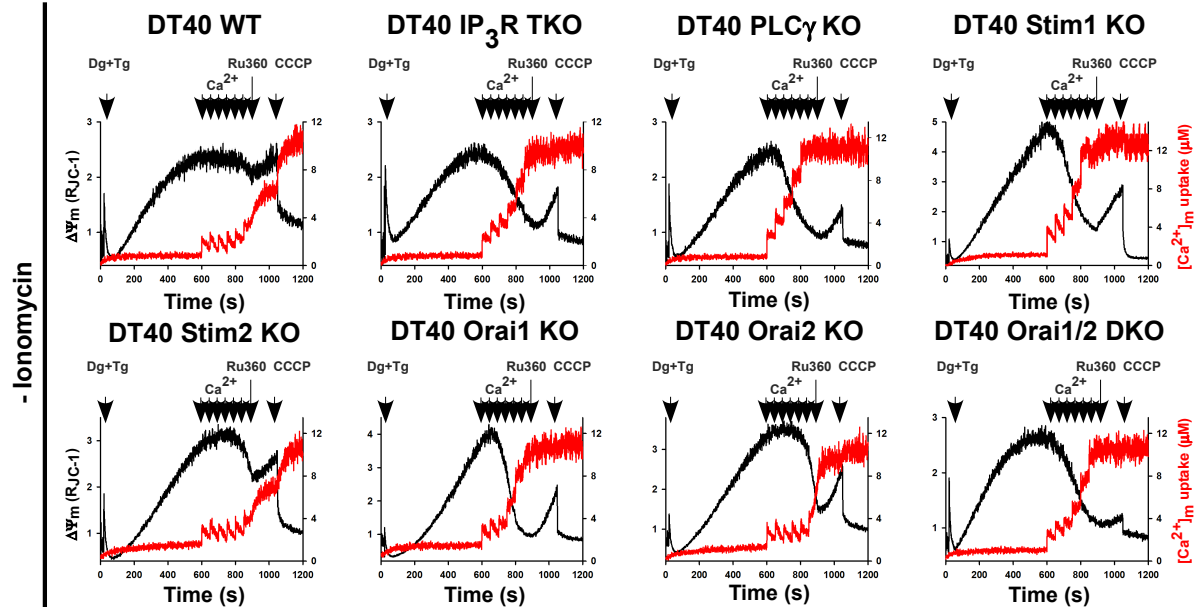**B**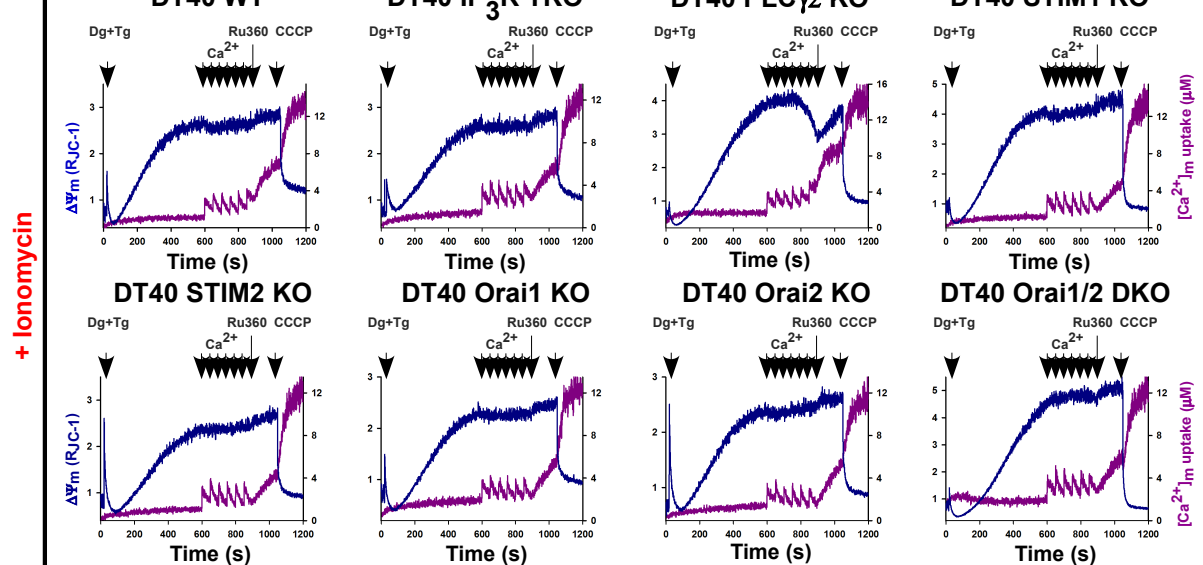**C**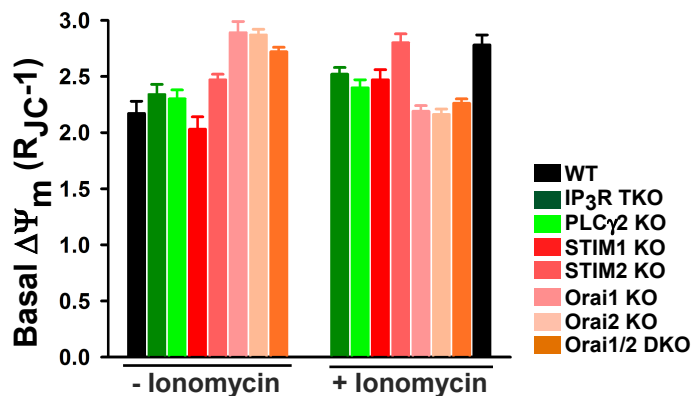

**A**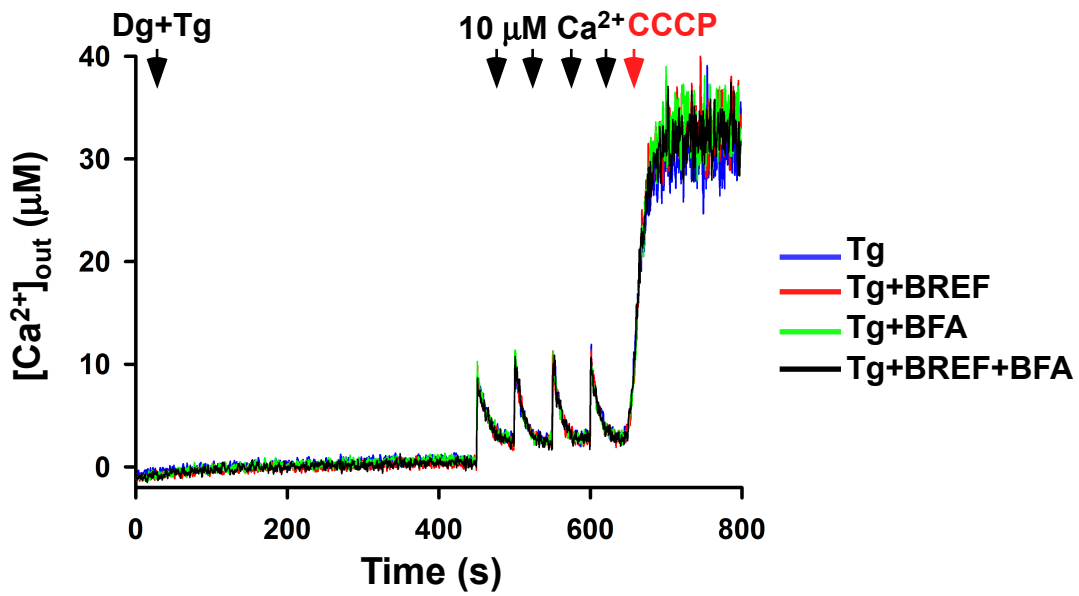**B**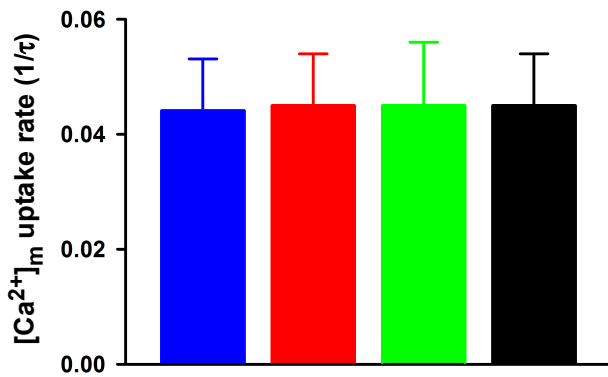**C**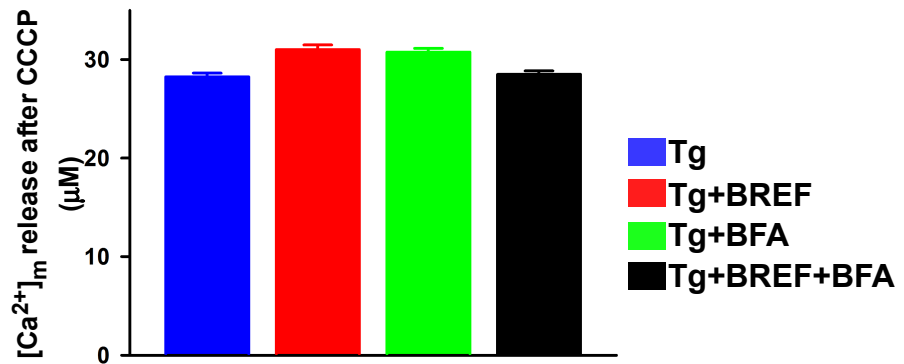

Wild-type

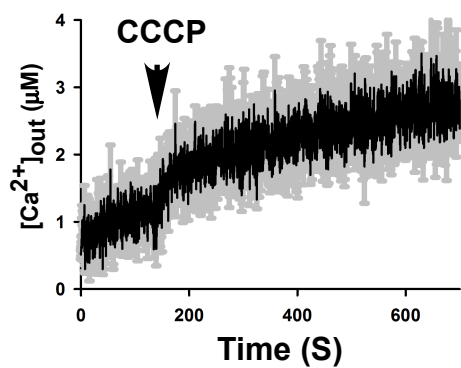

IP<sub>3</sub>R TKO

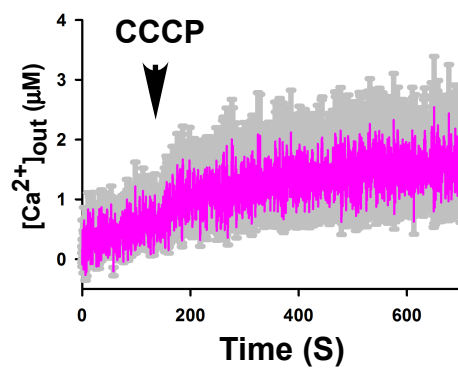

PLC $\gamma$ 2 KO

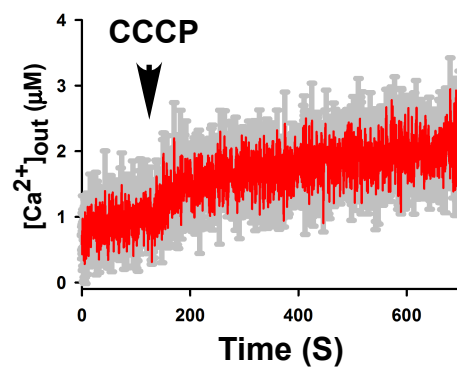

STIM1 KO

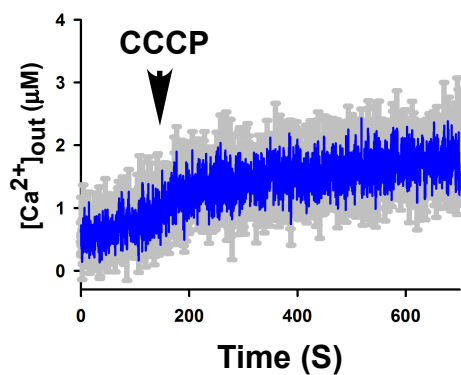

STIM2 KO

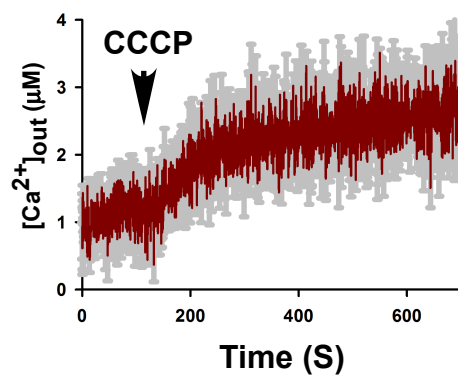

Orai1 KO

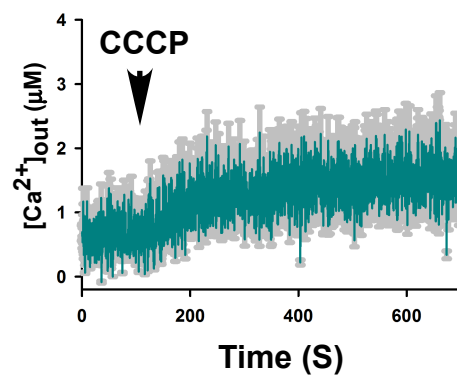

Orai2 KO

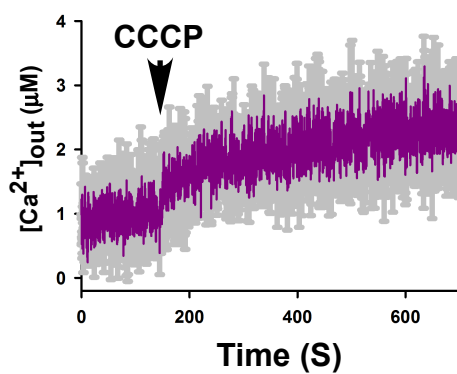

Orai1/2 DKO

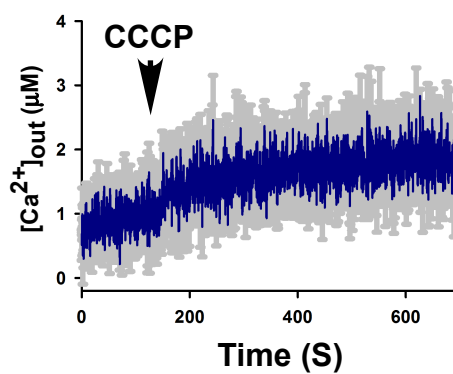

**A**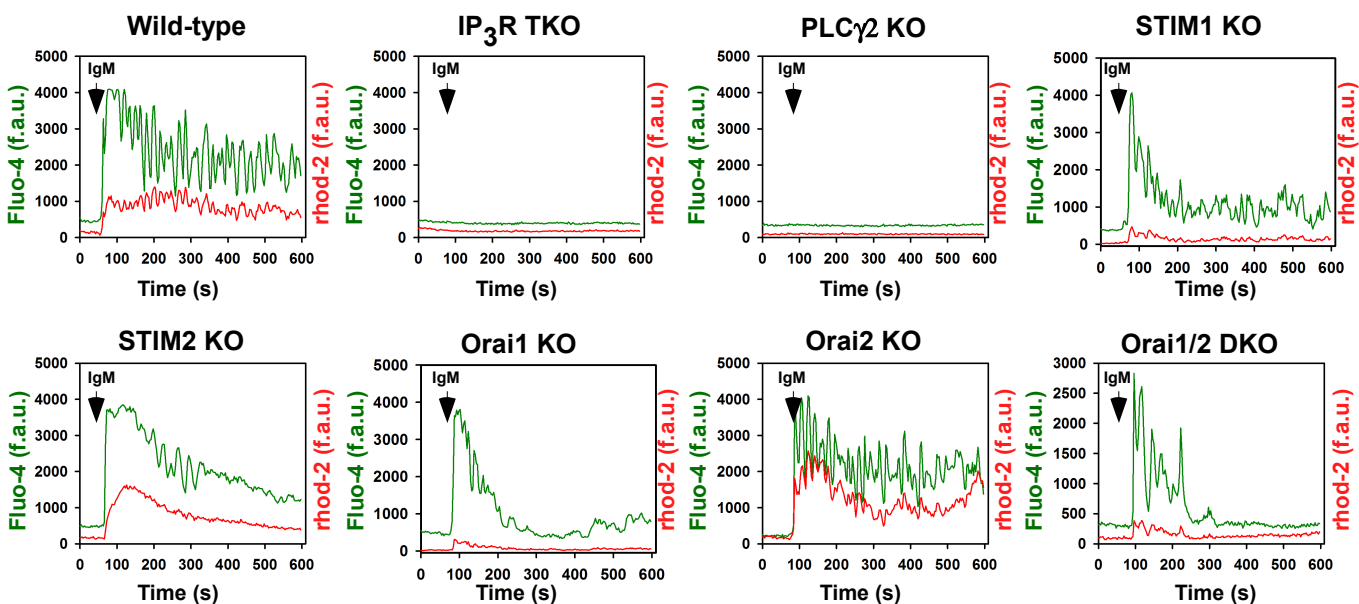**B**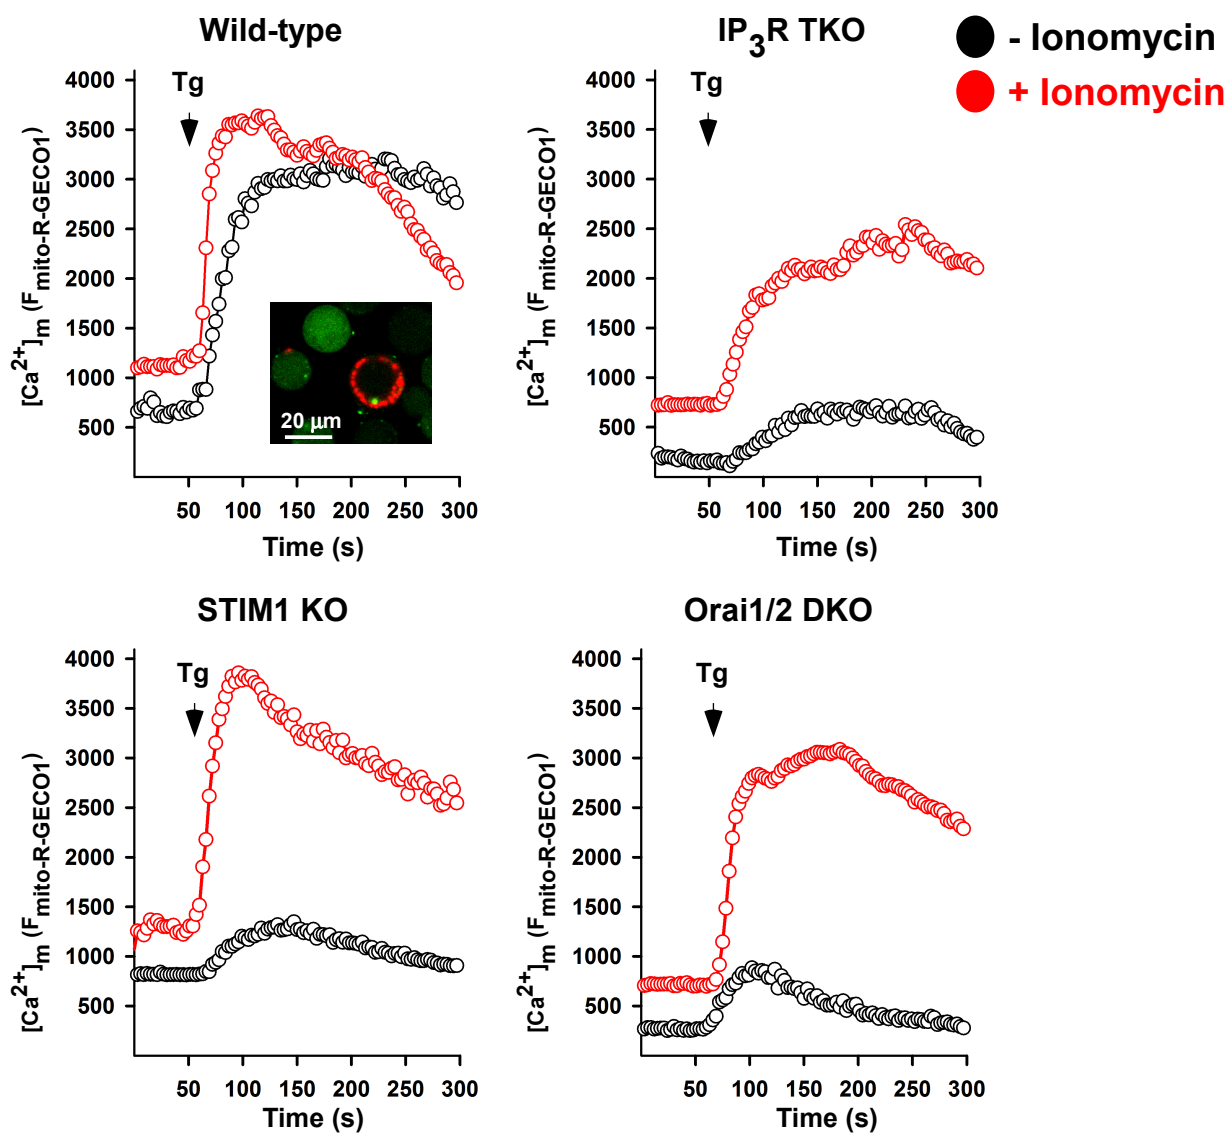

● - Ionomycin  
● + Ionomycin

**A**

Wild-type

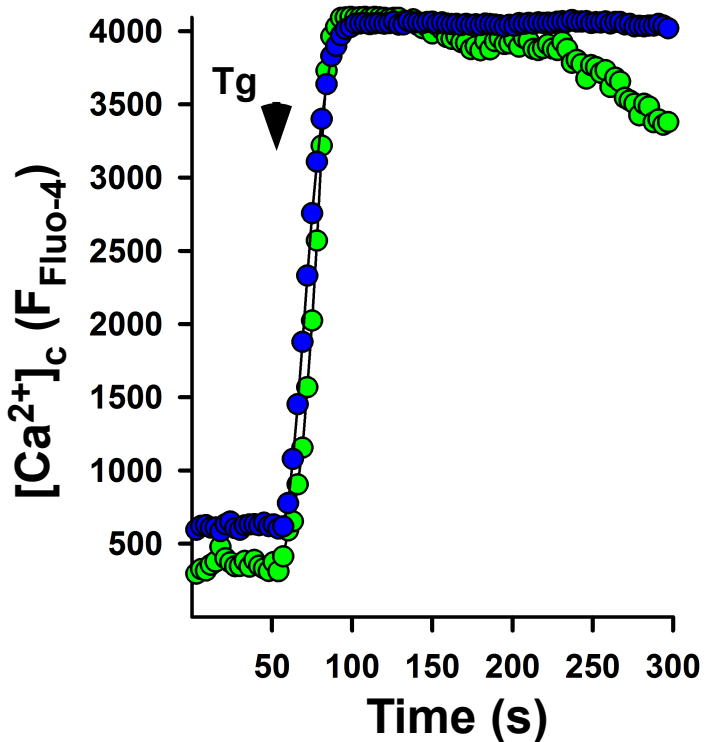

**B**

IP<sub>3</sub>R TKO

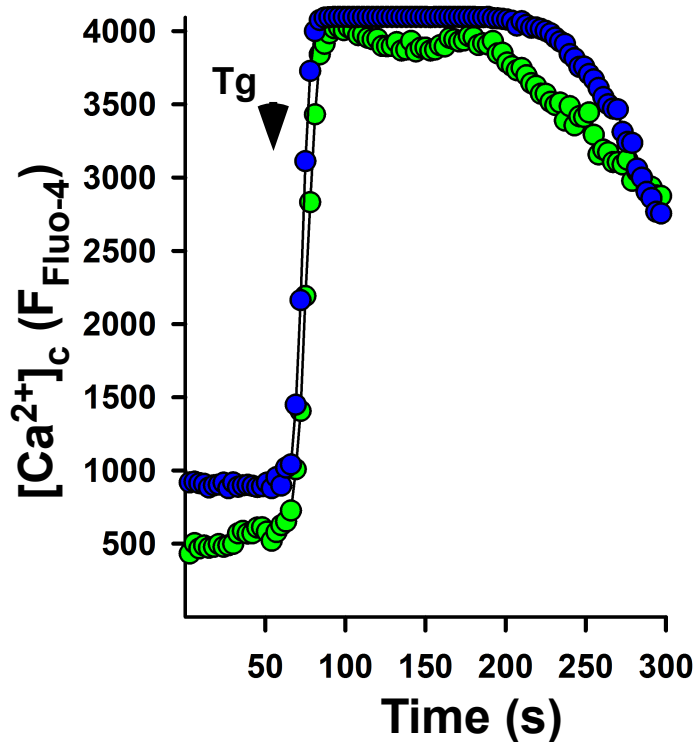

**C**

STIM1 KO

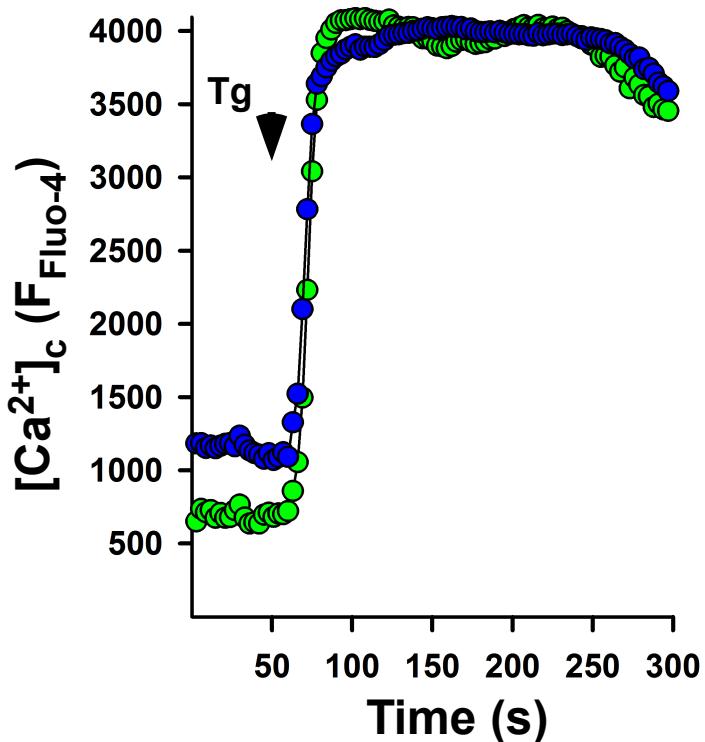

**D**

Orai1/2 DKO

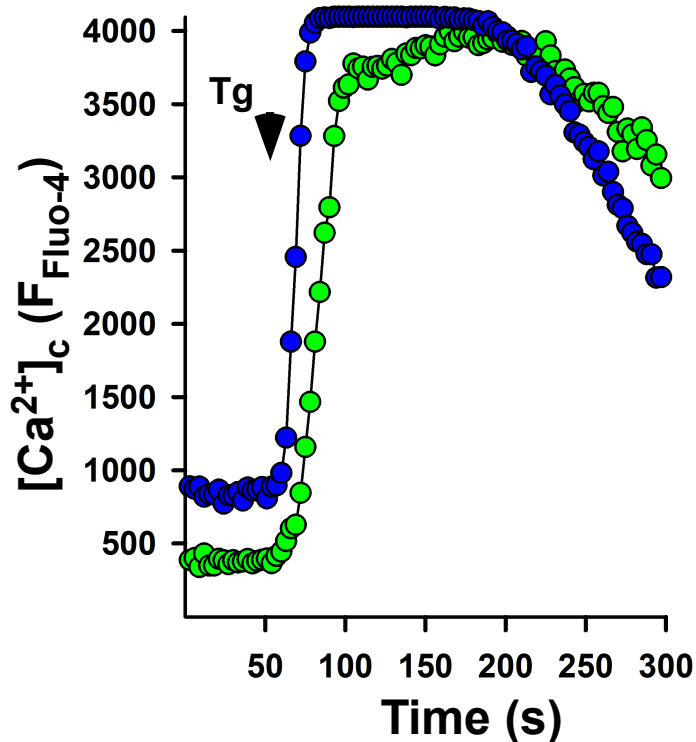

**A**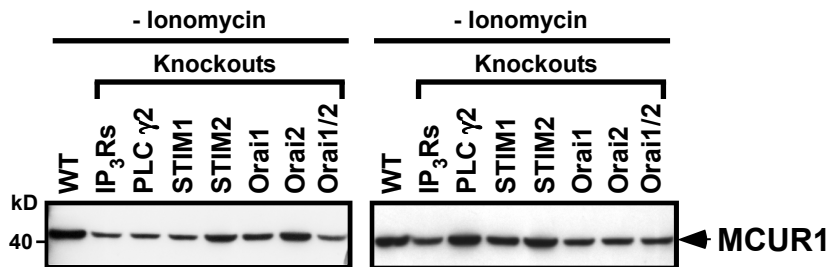**B**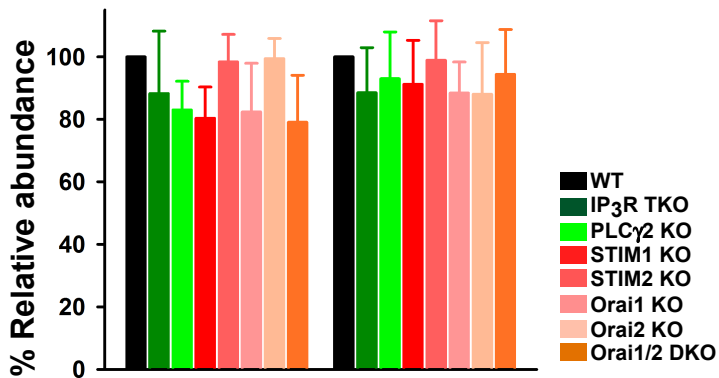

**A**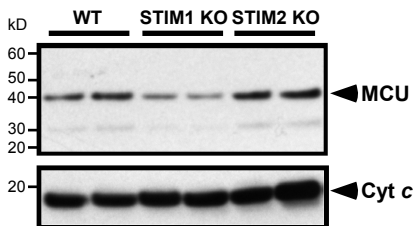**B**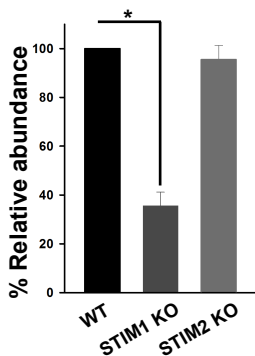**C**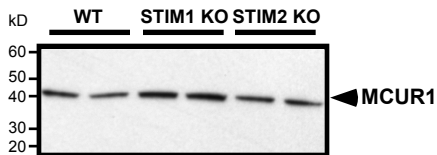**D**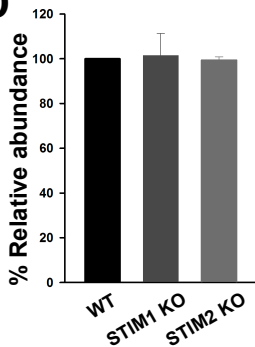

**A**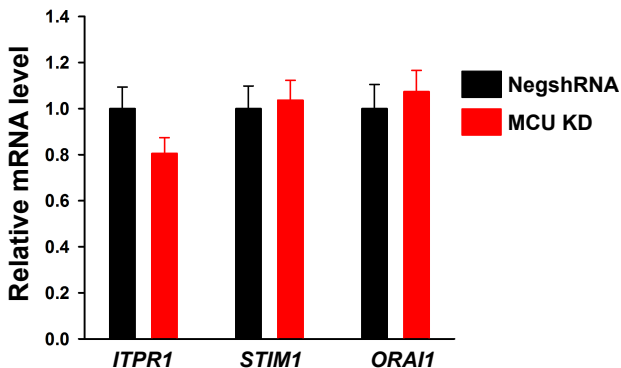**B**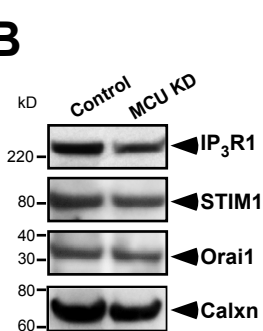**C**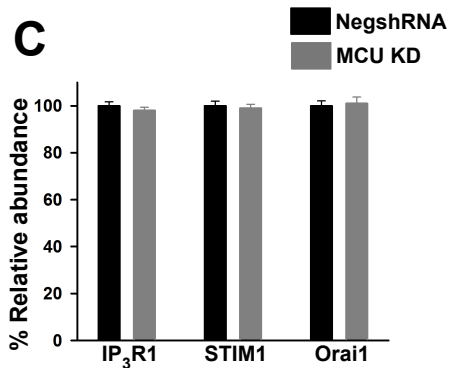



**A**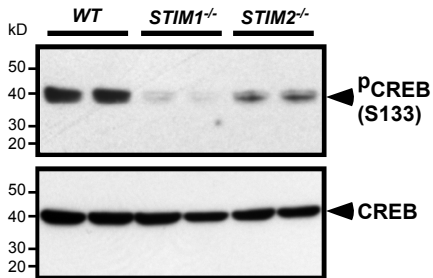**B**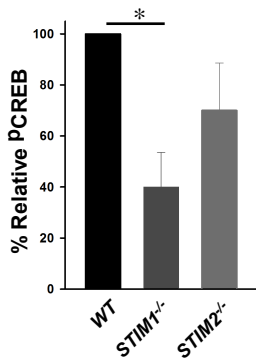

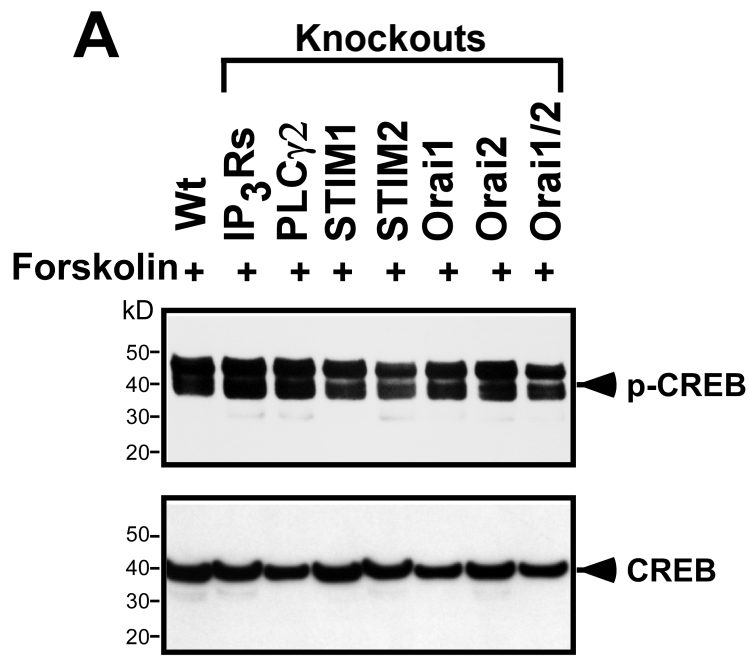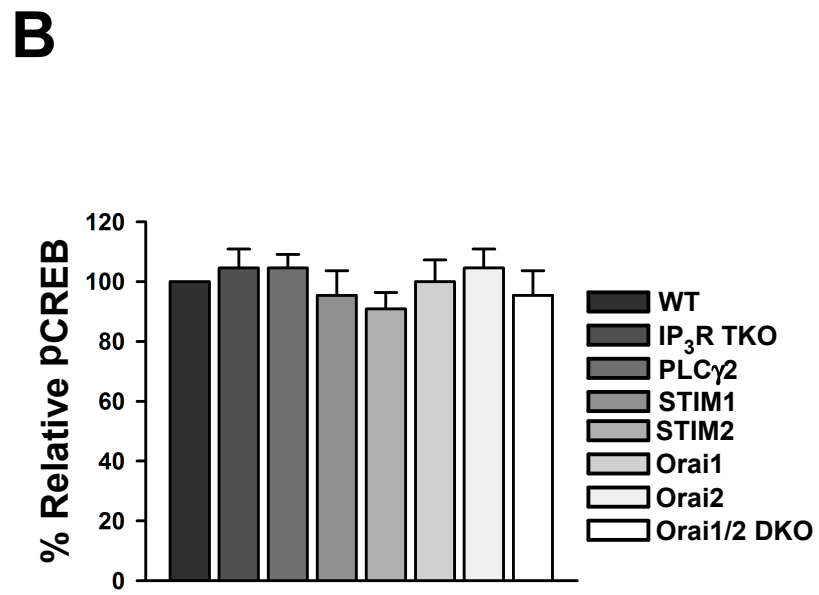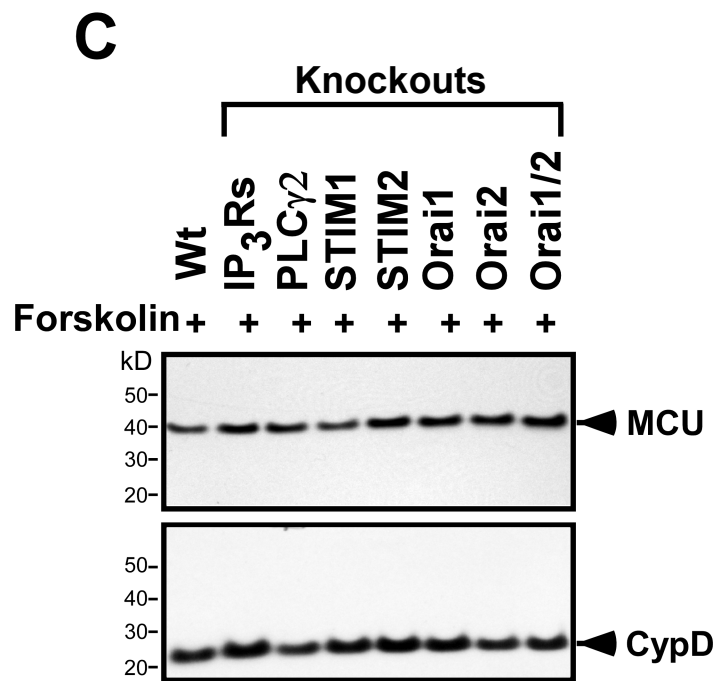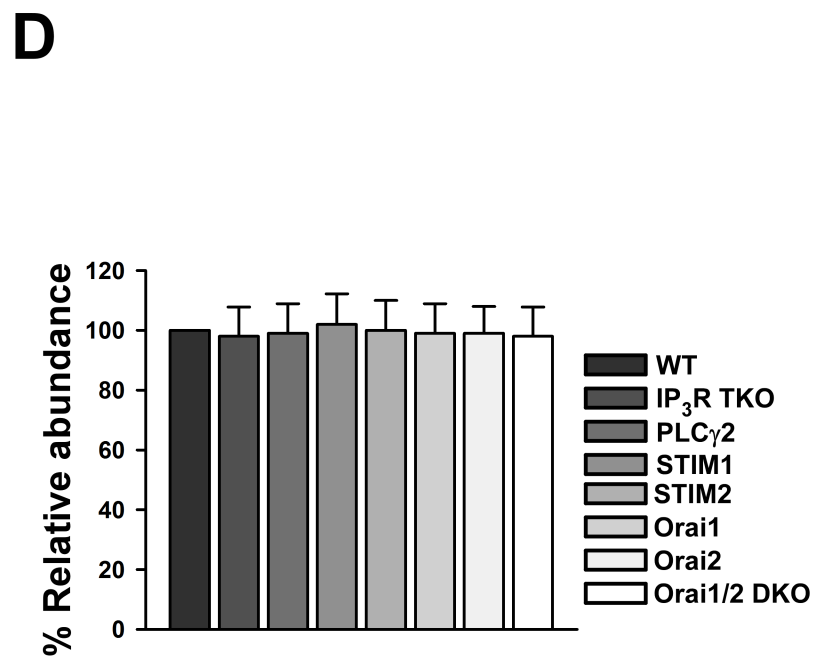

Supplement: NIHMS751056-supplement-supplemental.pdf [file NIHMS751056-supplement-supplemental.pdf]
